# Supplementary material for: The effect of tobacco expenditure on expenditure shares in South African households: A genetic matching approach
Source: PubMed Central journal article supplement (PMC6730990; doi:10.1371/journal.pone.0222000), 2019-09-06
Supplement: pone.0222000.s004.pdf [file pone.0222000.s004.pdf]

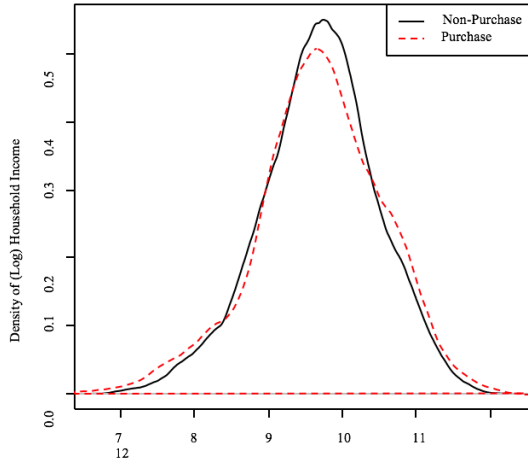

(a) Log HH Income: Quartile 4

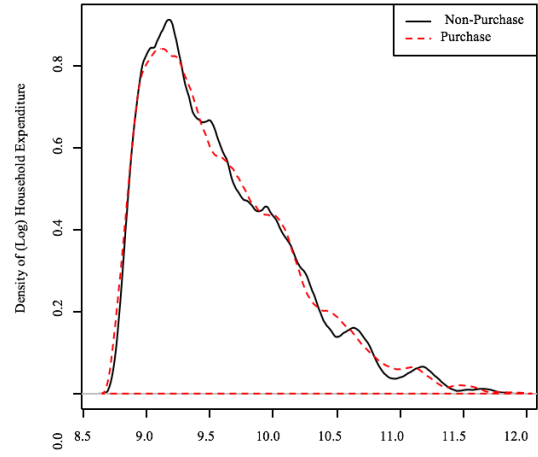

(b) Log HH Expenditure: Quartile 4
